# Supplementary material for: Nuclear pore heterogeneity influences HIV-1 infection and the antiviral activity of MX2
Source: eLife. 2018 Aug 7;7:e35738. doi: 10.7554/eLife.35738 (PMC6101944; doi:10.7554/eLife.35738)
Supplement: Supplementary File 1. — Tab 1. Figure 1 statistics. P values generated from two-tailed paired t tests for data represented in Figure 1. Tab 2. Nup and NTR knockdown statistics 1. P values generated from two-tailed paired t tests for data represented in Figures 8–11, addressing significance within experiments. Tab 3. Nup and NTR knockdown statistics 2. P values generated from two-tailed unpaired t tests for data represented in Figures 8–11, addressing significance between experiments. Tab 4. Figure 8 additional statistics. P values generated from two-tailed paired t tests for data represented in Figure 8—figure supplements 2D and 3A–C. [file elife-35738-supp1.xlsx]

## Sheet: Figure 1 Statistics
P values generated from two-tailed paired t tests for data represented in Figure 1.
Analysis includes three to six technical replicates representative of four to five independent experiments
		WT HIV-1			A92E			T210K			N74D			G89V			N57S			HIV-2			SIVmac			G94D			G208R			FIV			EIAV
		HeLa	HT1080	HOS	HeLa	HT1080	HOS	HeLa	HT1080	HOS	HeLa	HT1080	HOS	HeLa	HT1080	HOS	HeLa	HT1080	HOS	HeLa	HT1080	HOS	HeLa	HT1080	HOS	HeLa	HT1080	HOS	HeLa	HT1080	HOS	HeLa	HT1080	HOS	HeLa	HT1080	HOS
	Effect of Mx2: Dividing Cells	0.000433683	0.000461141		0.00014425	0.0372246		0.0862363	0.0410146		0.000133439	3.32448e-05		0.0109394	0.00716383		0.164426	0.281144		0.00294087	0.0338913		9.19517e-05	0.00411878		0.429757	0.00314586		0.0656844	0.0226454		0.00817676	0.0394221		0.000960176	0.00359055
	Effect of Mx2: Non-dividing Cells	0.00792911	0.0136068		0.0572151	0.0491982		0.142967	0.0649093		0.00348148	0.00747644		0.00501231	0.113418		0.962197	0.572266		0.0172047	0.131307		0.00287114	0.275609		0.0151396	0.0181078		0.12913	0.220701		0.0625904	0.265809		0.0934366	0.0621855
	Effect of Mx2: Dividing vs Non-dividing Cells	0.0321555	0.766765		0.399181	0.00496636		0.0219127	0.311583		0.0846987	0.481439		0.962026	0.859688		0.386602	0.173579		0.00842842	0.000280212		0.00103973	0.00159429		0.203003	0.234058		0.0155907	0.0318795		2.58482e-05	0.0277117		0.000129545	0.912292
	Effect of CsA: Dividing Cells	0.306378	0.00107579	0.0955724	0.0317095	0.0517406	0.128706	0.0078174	0.103309	0.348381	4.25007e-06	9.34051e-05	0.0163067	0.0417977	0.00781316	0.348538	0.047927	0.000125587	0.0572934	0.0536748	0.245534	0.189493	0.00588239	0.288239		0.0071792	0.00875672	0.00653007	0.00253029	0.0858981		0.0177015	0.0511752		0.000458795	0.0130532
	Effect of CsA: Non-dividing Cells	0.0473684	0.0423136	0.117579	0.103145	0.22232	0.362338	0.0305213	0.144444	0.505963	0.00692728	0.000100375	0.0710914	0.00145764	0.837369	0.622028	0.336145	0.132721	0.457072	0.0923913	0.0466638	0.658375	0.0190779	0.00445015		0.0686289	0.233017	0.528923	0.201388	0.20191		0.0274031	0.058727		0.0180118	0.186875
	Effect of Mx2 in CsA treated dividing cells	0.0149984	0.000496347		0.666406	0.00514175		0.00966814	0.0514675		0.0290385	0.000691442		0.260352	0.0780547		0.0763666	0.0162897		0.246216	0.357242		0.339173	0.190471		0.546932	0.00478249		0.0383035	0.24314		0.700466	0.154152		0.672781	0.0275724
	Effect of Mx2 in CsA non-treated dividing cells	6.38251e-05	5.98749e-05		0.805516	0.00466163		0.317401	0.141751		0.00847351	0.00248338		0.559485	0.404973		0.446941	*		0.180382	0.00571659		0.294746	0.0188468		0.179154	0.0764727		0.117384	0.501076		0.364532	0.0169093		0.376646	0.550999
	Color code:	p > 0.05; 0.05 ≥ p ≥ 0.01; 0.01 > p ≥ 0.001; p < 0.001																* - Cannot calculate p value because infectivity of N57S in CsA treated non-dividing HT1080 cells is zero in 5 of 6 replicates

## Sheet: Nup NTR Knockdown Statistics 1
P values generated from two-tailed paired t tests for data represented in Figures 8-11.
Not including Figure 8-figure supplements 2D, 3A-C (shown in separate tab)
Statistical analysis includes biological replicates not shown in figures.
Number of experiments conducted (each with three technical replicates) shown at the bottom of each table.
Blank wells represent samples that were not included in analysis due to insufficient knockdown or lack of expression as noted in the figures
	HeLa											HT1080								HOS
Color code:	p > 0.05; 0.05 ≥ p ≥ 0.01; 0.01 > p ≥ 0.001; p < 0.001											p > 0.05; 0.05 ≥ p ≥ 0.01; 0.01 > p ≥ 0.001; p < 0.001								p > 0.05; 0.05 ≥ p ≥ 0.01; 0.01 > p ≥ 0.001; p < 0.001
	Effect of siRNA knockdown on infectivity											Effect of siRNA knockdown on infectivity								Effect of siRNA knockdown on infectivity
siRNA	WT	WT Non-dividing cells	HIV-2	SIVmac	FIV	EIAV	N57S	A92E	T210K	G89V		WT	WT Non-dividing cells	FIV	N57S	A92E	T210K	G89V		WT	WT Non-dividing cells	FIV	N57S	A92E	T210K	G89V
SEH1L	1.64232e-05	0.462931	0.0491427	2.50252e-06	1.20508e-05	0.00037099	0.00240092	0.000234838	0.00326015	0.0567961		0.278544	0.00216951	0.00696467	0.0198821	0.0238766	0.84467	0.401743		4.45795e-06	0.0782194	0.900751	0.112017	0.755958	0.812948	0.468517
NUP85	6.6963e-10	0.0739365	4.78176e-07	2.28296e-09	0.00593931	0.000672594	2.80335e-05	0.000697448	1.84608e-05	0.255222		0.000228504	0.00331982	0.151378	1.32985e-06	0.000113656	0.0303376	0.56489		0.00362824	0.719124	0.519193	0.0950487	0.321003	0.32263	0.148618
NUP160	1.20384e-08	3.13495e-07	1.24348e-05	7.95331e-08	1.52416e-05	3.37449e-05	1.33899e-11	1.93854e-06	7.40611e-07	5.99754e-11		2.9189e-08	0.000198285	0.609427	2.56143e-10	2.20271e-07	0.976879	0.511372		3.17209e-09	2.63203e-06	0.0101756	0.00111074	0.000139893	0.000337902	0.162878
SEC13	3.63407e-11	9.63516e-06	9.4122e-06	1.25644e-05	0.00130183	0.00273279	1.91251e-09	2.029e-05	1.44336e-05	1.28309e-10		0.0405636	0.106691	0.549993	9.63533e-07	7.51686e-06	0.0842933	0.483286		2.04744e-08	3.14494e-05	0.218279	0.0142094	0.0036063	0.00466236	0.472936
NUP98	2.01635e-05	7.22328e-05	6.87247e-06	6.58606e-07	0.0492367	0.000526201	4.43817e-08	0.842961	0.00184878	4.51795e-10		2.29561e-05	0.38764	0.248723	1.05635e-05	0.0100582	0.230929	0.985921		0.244247	0.228491	0.166208	0.0759685	0.079289	0.149581	0.0893754
NUP107	8.75165e-07	5.51051e-09	0.00666928	0.337072	0.0949494	0.022616	3.98604e-09	8.6576e-05	0.012969	6.4769e-05		0.785595	0.0314808	0.0103916	0.00165634	0.00133289	0.205612	0.662657		3.67863e-07	1.4045e-05	0.596408	0.00417153	0.0152	0.619512	0.288474
NUP133	3.22756e-06	0.083473	0.00106792	0.00150451	0.0939416	0.846356	5.70182e-11	0.309717	0.439596	0.058732		0.161011	0.0610622	0.181235	3.0647e-06	0.0133224	0.0180649	0.419371		2.80279e-07	0.658419	0.872954	0.00485044	0.00025342	0.188723	0.392671
NUP37	0.00190705	0.00808353	0.366114	0.515474	0.166173	3.32386e-05	0.000427674	0.0372409	0.00118812	4.32481e-05
NUP43	2.32728e-06	0.121713	0.0181737	2.14529e-06	0.0011119	0.000111532	0.000148123	0.00270653	0.000261794	0.230343		0.713591	0.719357	0.121612	0.00671363	0.00148596	0.071323	0.439808		0.000674901	0.620602	0.0685339	0.0902584	0.604125	0.810265	0.100541
AHCTF1	1.04177e-06	0.531097	0.000115172	0.0396278	0.509517	0.0276435	1.31983e-08	0.000409754	2.71584e-05	1.35343e-07		0.00299576	0.0215123	0.562968	0.0604428	0.0122688	0.575806	0.275253		0.820237	0.867901	0.94104	0.075648	0.180626	0.0115027	0.0147791
NUP93	4.42281e-06	0.000308627	0.00187634	0.00705621	0.0119267	0.017842	6.20839e-09	5.23279e-07	0.00885263	1.40236e-07		0.0128029	2.65823e-05	0.774339	1.34404e-05	0.00129189	0.228943	0.00735111		1.26115e-05	9.08882e-05	0.00028095	3.21032e-05	0.505841	0.000249049	0.446032
NUP205	0.00121928	3.76206e-05	0.414497	0.72209	0.736491	0.233173	6.11916e-10	0.00248269	0.123557	2.93443e-05		0.00447335	1.4688e-07	0.741224	9.66884e-05	0.000275747	0.0676669	0.803507		1.41544e-05	9.19352e-07	7.58731e-05	0.00027355	0.317116	2.11681e-06	0.00113051
NUP188	0.000202518	0.0705851	0.422487	0.011949	0.0065395	0.873072	0.224464	0.00112624	0.07397	4.23497e-05		0.0529106	0.745093	0.136605	0.206278	0.556601	0.0128439	0.00142772		0.0201922	0.546302	0.0136834	0.176196	0.139763	0.0371577	0.0509228
NUP155	1.05274e-07	0.155925	1.43049e-06	7.70842e-10	0.121895	0.000123576	0.00119091	0.0137581	0.299599	1.63768e-08		0.370311	0.374214	0.315368	0.22138	0.00167871	0.126693	0.280247		1.73607e-06	6.99993e-06	0.711202	0.0669409	0.00528829	0.0103031	0.424439
NUP35	2.82147e-09	0.000436883	0.196887	0.000305796	0.108149	0.00590599	0.0580301	0.000124144	0.0101117	0.0011899		0.0180106	0.291533	0.0577147	0.567265	0.196185	0.0196689	0.14107		9.33967e-09	1.04322e-05	0.126915	0.107469	0.0872304	0.451046	0.484846
NUP62	0.794903	0.000502519	0.00111571	3.14378e-05	0.0894262	0.299666	0.000178258	1.33524e-06	0.763658	2.58108e-09		2.69408e-05	0.17307	0.154203	9.82562e-05	0.0106583	0.0140402	0.0910057		0.00221267	4.45112e-05	0.168142	0.005998	0.145585	0.101197	0.0939523
NUP54	1.17163e-05	4.56787e-09	0.000939785	3.79546e-06	0.00689019	4.78162e-05	0.00452442	7.92845e-05	0.00416344	1.19402e-09		1.35695e-05	0.994027	0.0156212	0.00218089	0.138821	0.00369191	0.0453238		8.78976e-05	1.46286e-05	0.79136	0.00691156	0.0193282	0.0525712	0.300157
NUPL1	1.14217e-06	1.53609e-07	0.000349016	7.75076e-06	0.00944453	1.98478e-06	0.000306784	7.07145e-06	6.41073e-05	7.4251e-06		1.82732e-05	0.307262	0.00268901	0.0121373	0.0563186	0.02372	0.000419868		0.00436676	1.6812e-05	0.373272	0.00397956	0.695335	0.0198291	0.0780723
NUP210	9.8948e-05	0.519825	0.55291	0.267902	0.0417108	0.703656	0.000513482	0.000181906	0.0452481	0.00319068										0.0030954	0.00138662	0.253629	0.124846	0.730275	0.0933414	0.320668
GLE1	2.56255e-06	0.283617	0.534177	0.0660352	0.564664	0.118762	0.102219	0.000253206	0.611389	0.80979		0.0421782	0.353727	0.0222937	0.0750226	0.919685	0.116229	0.0066694		0.176378	0.753094	0.0985524	0.378421	0.599972	0.640516	0.0199019
RANBP2	4.41913e-11	5.04197e-13	0.00181769	0.0103509	0.0540489	0.00120111	4.87534e-09	1.91509e-08	7.47435e-05	1.57341e-08		3.90225e-09	1.22222e-08	0.0296453	2.13187e-09	7.43601e-05	2.70288e-08	0.000111087		1.43657e-09	1.03279e-05	0.193415	0.0490106	2.77001e-06	0.00113292	0.530043
NUP88	2.21733e-08	0.122023	0.000124158	2.17875e-05	0.115017	8.24314e-05	8.64926e-07	4.78117e-05	1.1957e-08	9.48974e-08		0.0198499	0.77967	0.369764	0.0276732	0.609655	0.0332531	0.000183393		0.0344346	0.0808007	0.263957	0.00203897	0.611149	0.0844025	0.0816665
NUP214	2.7458e-10	0.000386249	3.05694e-06	4.33596e-05	0.827605	0.0286303	1.17572e-05	0.0412993	0.764763	1.22247e-08		0.0528596	0.814785	0.112194	0.000477572	0.00531697	0.829402	5.18721e-05		0.00153215	0.0784657	0.488647	0.191661	0.505836	0.0239665	0.418752
RAE1	0.00200739	0.528931	0.636406	0.39741	0.0103501	0.295974	0.409243	0.0898459	0.465369	0.276235										0.00440858	0.0574826	0.0993875	0.806506	0.0594353	0.568698	0.0652561
AAAS	8.0709e-05	0.187494	0.759893	0.3452	0.01289	0.000674195	0.514539	0.191234	0.236702	0.169032		0.1976	0.298633	0.417541	0.401914	0.0244714	0.600723	0.00144091		0.000690031	0.000349531	0.14741	0.272982	0.10912	0.0448515	0.186709
NUP153	5.56186e-15	1.26177e-11	2.4501e-06	3.02918e-06	0.00354221	0.127712	8.07173e-09	0.00074501	0.213119	2.72378e-08		6.94245e-10	4.65901e-05	0.0226264	3.39922e-05	0.000656331	0.00370498	0.0801439		8.08782e-09	2.62276e-07	0.089499	0.0828123	0.000157744	0.0125811	0.805262
NUP50	5.51801e-08	0.0476825	0.220417	0.211554	0.043377	0.111973	0.671129	8.47937e-08	0.0212973	0.000874887		0.546395	0.0689318	0.383964	4.43066e-06	3.66496e-05	0.52512	0.434428		0.177686	0.096014	0.889665	0.200929	0.778522	0.350712	0.100868
TPR	0.0064099	0.175354	0.000898024	0.527207	0.0130234	0.0841785	0.0419354	0.701967	0.519442	0.150134		0.0195704	0.390378	0.00205786	0.12707	0.515369	0.0822044	0.0334517		0.145847	0.0379023	0.690843	0.0302448	0.349338	0.0386235	0.308178
TNPO3	1.3439e-13	1.09094e-07	8.92307e-11	2.07766e-11	0.103457	6.77866e-09	0.0409308	5.98019e-12	8.01075e-06	3.40647e-10		6.96756e-12	7.98961e-07	0.0536693	8.31337e-05	0.00146893	1.61529e-07	0.0175233		0.000800877	4.60536e-08	0.224882	0.177198	0.000361826	0.000228627	0.226234
TNPO1	2.07578e-05	0.0600001	0.881826	0.0623523	0.0348038	0.626291	0.0256427	0.000727978	0.0016185	0.0597534		0.00123307	0.565581	0.00909699	0.00971354	0.574751	0.0559017	0.00823271		0.48469	0.342106	0.0765563	0.156347	0.813769	0.523609	0.267552
TNPO2	0.122502	0.0338706	0.0941485	0.93351	0.0260514	0.764081	0.37273	0.156818	0.369315	0.00673278		0.70554	0.893895	0.152853	0.763326	0.269232	0.699813	0.933042		0.23728	0.221752	0.131711	0.148334	0.787176	0.877567	0.0765437
KPNA2	0.000438978	0.0862089	0.398788	0.0114517	0.000309337	2.73966e-05	0.220012	9.91844e-05	0.031506	0.00707818		0.00408692	0.643765	0.396098	0.504869	0.00537579	0.500351	0.108341		0.394926	0.416024	0.86778	0.0909212	0.240496	0.140992	0.0778815
KPNB1	4.80598e-05	2.96227e-06	0.107164	0.997968	0.0447846	0.0182351	8.76286e-08	0.531542	0.727854	0.223197		0.921685	6.8043e-05	0.220509	1.17918e-05	0.00105901	0.0468667	0.000511056		0.0121776	1.92331e-05	0.00142285	0.0142389	0.29172	3.85e-07	2.64952e-05
KPNA1	0.00142505	0.252255	0.142059	0.0678481	0.0145911	0.378082	0.231208	0.0194073	0.144693	0.00866064		0.00874813	0.361077	0.00806525	0.586516	0.00377036	0.112532	0.165423		0.232719	0.494074	0.275328	0.206512	0.431976	0.998109	0.0800348
KPNA3	0.280942	0.0687285	0.412934	0.0512707	0.255671	0.00113567	0.759034	0.365789	0.0746723	0.476095		0.214863	0.0181919	0.37817	0.845519	0.189862	0.0918383	0.594072		0.25301	0.737602	0.172494	0.226137	0.913201	0.523573	0.162462
KPNA4	0.0620319	0.620828	0.964452	0.192437	0.278077	0.0310421	0.00737024	0.0110951	0.0465961	0.0852399		0.189973	0.0206449	0.0159786	0.985555	0.836262	0.19346	0.234003		0.318697	0.00801196	0.144218	0.219174	0.413507	0.994412	0.0403876
KPNA5	0.000687011	0.0977612	0.424785	0.506232	0.333921	0.289953	0.217885	0.00327911	0.0419137	0.730741		0.223035	0.00941196	0.68364	0.518089	0.00116149	0.626526	0.581099		0.0528652	0.986545	0.857667	0.302367	0.377837	0.410999	0.0205936
KPNA6	0.623423	0.39623	0.136554	0.840106	0.392775	0.0250601	0.0116577	0.788392	0.170152	0.900966		0.367112	0.0827295	0.992214	0.252366	0.304081	0.698795	0.807516		0.114495	0.00295789	0.846233	0.0681608	0.943101	0.286212	0.037822
IPO4	2.96823e-05	0.0024262	0.407815	0.0317088	0.0116095	0.0252643	0.038934	0.0136654	0.0530763	0.0340755		0.0363106	0.0049549	0.0253473	0.00919583	0.171555	0.00619079	0.533426		0.239139	0.90278	0.138444	0.0819937	0.417024	0.42118	0.129658
IPO5	0.348479	0.757888	0.928485	0.973916	0.495103	0.258331	0.0795696	0.014277	0.178273	0.0891418		0.0289112	0.314052	0.440831	0.19622	0.000144866	0.0281078	0.0772617		0.933413	0.00304823	0.112253	0.0135064	0.321969	0.312893	0.223823
IPO7	0.00825666	0.495143	0.0426502	0.623114	0.763514	0.0477084	0.00077542	0.397449	0.244766	1.54154e-06		0.201458	0.096513	0.205568	0.78731	0.119605	0.246718	0.00128283		0.181495	0.117143	0.0463069	0.0194341	0.534159	0.656699	0.0608152
IPO8	0.0413454	3.54968e-06	0.565492	0.370397	0.142305	0.963883	8.55391e-05	0.424005	0.416806	0.550583		0.149523	0.13607	0.167439	0.0287149	0.678423	0.0882889	0.0766984		0.599405	0.000740429	0.0229451	0.0342805	0.584051	0.193232	0.564248
IPO9	0.000913962	0.412427	0.601536	0.034692	0.0135863	0.0029429	0.325837	0.00116817	0.479261	0.0613413		0.20181	0.650746	0.0475146	0.450618	0.0275151	0.436207	0.222411		0.480273	0.188726	0.304846	0.186467	0.0501073	0.669392	0.0545836
IPO11	0.0144772	0.265807	0.00414825	0.00142834	0.00564879	0.543867	0.438732	0.00409067	0.0928688	0.010175		6.11431e-05	1.02986e-05	0.467608	0.0717007	0.0022699	0.0571412	0.125641		0.316152	0.000511874	0.589659	0.0412537	0.188873	0.318834	0.0592297
IPO13	0.000954382	0.790937	0.125669	0.897442	0.00552856	0.00335577	0.902485	0.0921539	0.519916	0.00307793		0.417071	0.000466957	0.0535353	0.300143	0.434191	0.00554336	0.840795		0.0045192	1.59808e-06	0.931159	0.0493704	0.751795	0.877936	0.0592226
CPSF6	2.90378e-05	0.0115498	0.00970506	0.00550193	0.070594	0.546303	0.64371	0.000304209	0.00069795	0.718032		0.000892448	0.0359211	0.00587888	0.31761	0.723066	0.019724	0.099521		0.158496	0.147613	0.00837322	0.0387062	0.119088	0.175843	0.0470511
MX2	1.80271e-05	0.655581	0.219179	0.0613524	0.769858	0.671858	0.20395	0.0033499	0.351847	0.0808794		0.813881	0.00108498	0.0370573	0.759902	0.182346	0.491056	0.00389251		0.67219	0.352666	0.771405	0.115174	0.50698	0.0324901	0.619881
# of Experiments	5	5	3	3	3	3	3	4	3	4		3	3	3	5	3	3	3		3	3	2	2	3	3	2
	Effect of siRNA knockdown on Mx2 Activity											Effect of siRNA knockdown on Mx2 Activity
siRNA	WT	WT Non-dividing cells	HIV-2	SIVmac	FIV	EIAV	N57S	A92E	T210K	G89V		WT	WT Non-dividing cells	FIV	N57S	A92E	T210K	G89V
SEH1L	7.81508e-05	0.00499938	0.0179351	0.219357	0.00595942	0.0529931	0.111422	0.000226404	0.379257	0.00129484		0.0325295	0.21424	0.0349837	0.20531	0.113615	0.386099	0.00251701
NUP85	2.59219e-05	0.000636079	0.281276	0.0983157	0.0018894	0.00521937	1.51544e-05	0.00884518	0.261942	1.86036e-05		0.00306519	0.0283378	0.0100412	0.0490287	0.0391301	0.994362	1.16488e-05
NUP160	0.0308581	0.0665917	0.326723	0.21006	0.0532173	0.481947	0.0447459	0.588803	0.384808	0.142635		0.0819498	0.13313	0.0281705	0.0208374	0.139032	0.379195	0.0692541
SEC13	0.0231266	0.00175774	0.738523	0.00640873	0.271178	0.158122	0.015744	0.00098744	0.152751	0.000443008		0.0755168	0.351239	0.00614536	0.00374847	0.139229	0.797857	0.000459128
NUP98	0.221061	0.000652032	0.0886333	0.497663	0.0518036	0.850768	5.52437e-06	0.0033006	0.830546	0.762357		0.0546514	0.395925	0.0153262	3.31053e-06	0.0115866	0.206153	0.535109
NUP107	0.000172692	0.000573442	0.270846	0.846772	0.0986113	0.841617	0.698819	0.80532	0.804025	0.713418		0.00874559	0.047572	0.00455239	0.364493	0.0312084	0.114831	0.513524
NUP133	0.000225369	0.000131949	0.0466729	0.0483272	0.131636	0.484045	0.311116	0.886285	0.82303	0.475288		0.00149798	0.0128753	0.00567873	0.375824	0.00332241	0.0218003	0.284974
NUP37	0.7249	0.378472	0.235041	0.0496946	0.00404063	0.00487484	0.000471268	0.821546	0.7175	0.991034
NUP43	0.000156076	0.00104997	0.117979	0.214796	0.00174338	0.00304868	0.0453786	0.000897442	0.298073	0.000391808		0.0164843	0.300784	0.00676228	0.0183063	0.0207511	0.716506	0.000391808
AHCTF1	0.0953567	0.0432928	0.0449516	0.167626	0.216128	0.132606	0.781528	0.560271	0.20807	0.0314949		0.00377671	0.687047	0.115579	0.558983	0.582664	0.896686	0.0314949
NUP93	0.157906	0.0123467	0.0127465	0.29404	0.110727	0.3099	0.692196	0.598553	0.535744	0.726037		0.00192661	0.210599	0.0589956	0.961952	0.00730372	0.15462	0.726037
NUP205	0.0337841	0.0043501	0.107827	0.580001	0.364237	0.432023	0.79503	0.1982	0.255577	0.899361		0.100691	0.717021	0.0929978	0.871533	0.0872038	0.00168996	0.675292
NUP188	0.000199831	0.869203	0.0332248	0.15764	0.0303331	0.0933072	0.023158	0.499118	0.451349	0.00172377		0.238621	0.059324	0.0155818	0.00120804	0.941673	0.831056	0.00172377
NUP155	0.067205	0.0470685	0.324225	0.102408	0.130183	0.921634	0.176885	2.6525e-07	0.400569	0.000891915		0.439037	0.037623	0.395651	1.34934e-05	0.406529	0.017084	0.000891915
NUP35	0.883003	0.217005	0.703859	0.413138	0.216012	0.0108403	0.0142429	0.999629	0.588936	8.21307e-05		0.87023	0.0844744	0.907628	0.62445	0.429689	0.693916	8.21307e-05
NUP62	0.00248699	0.00556705	0.251499	0.581963	0.0380471	0.118147	0.470209	0.00814947	0.302175	0.000303736		0.983425	0.756072	0.0345826	0.322883	0.0287581	0.000238275	0.000303736
NUP54	0.000103116	0.658669	0.000450692	0.00477213	0.0016631	0.0288884	0.00191719	0.436407	0.721569	2.99183e-06		4.83703e-06	1.63094e-06	0.0644805	0.00744163	0.499056	0.000494557	2.99183e-06
NUPL1	0.261471	0.281488	6.13158e-05	0.8437	0.000264545	0.0657632	0.00629726	0.000448233	0.451074	6.12071e-06		0.0316873	0.0726289	0.0308967	0.0138544	0.824925	0.00152083	6.12071e-06
NUP210	0.0787675	0.265504	0.365937	0.0828117	0.591717	0.731393	0.0318776	5.35685e-06	0.455923	0.139794
GLE1	0.00216142	0.00800887	0.162328	0.240732	0.00103075	0.181345	0.00149694	9.00024e-07	0.327091	0.102229		0.173063	0.338418	0.413754	0.242323	0.949638	0.475718	0.102229
RANBP2	0.133181	0.22322	0.52431	0.384543	0.588521	0.548568	0.811837	0.958581	0.458658	0.850969		0.0190415	0.0458625	0.0839795	0.000156877	0.543004	0.128815	#DIV/0!
NUP88	0.0120795	0.0148961	0.470286	0.747157	0.164549	0.313025	0.00236483	0.166472	0.450989	0.00383858		0.000142772	0.00852167	0.567871	0.45449	0.0389985	0.00456862	0.00383858
NUP214	0.0623918	0.0155913	0.7015	0.961604	0.201915	0.35973	0.50836	0.181876	0.211307	0.122737		0.000249671	0.00363397	0.662292	0.945515	0.0539918	0.405163	0.122737
RAE1	0.31612	0.076746	0.197222	0.209353	0.00725726	0.00727439	9.30331e-05	0.255305	0.248206	0.454898
AAAS	0.733593	0.0337492	0.901106	0.494201	0.00738417	0.354976	0.773491	0.022875	0.472891	0.111809		0.160779	0.93798	0.195546	0.420343	0.0346333	0.378047	0.111809
NUP153	0.00103826	0.190291	0.249152	0.00872457	0.432157	0.426342	0.576272	0.334276	0.343622	0.139774		0.0496629	0.83216	0.040569	0.883313	0.00291485	0.341318	0.139774
NUP50	0.203714	0.0503347	0.0270715	0.00029742	0.712829	0.0441792	0.690843	0.0104545	0.231815	0.172776		0.32816	0.960152	0.359372	0.0435434	0.0369439	0.975137	0.172776
TPR	0.0726749	0.0303168	0.00486362	0.0748288	0.0113398	0.0139113	0.00040262	0.0378613	0.827424	0.935365		0.0509234	0.857694	0.0432762	0.162764	0.0115067	0.417881	0.935365
TNPO3	0.0356786	0.58894	0.439097	0.606587	0.228269	0.109759	1.18783e-08	0.009828	0.0379681	2.15597e-07		0.00551905	0.953319	0.0487612	0.943148	0.0721727	0.0400194	2.15597e-07
TNPO1	2.49681e-05	0.00933048	0.0117364	0.0616995	0.0140609	0.000689315	0.0256173	0.572891	0.405491	0.000640089		0.00168523	0.016496	0.0937029	0.297686	0.027382	0.0316067	0.000640089
TNPO2	0.446035	0.0329101	0.932099	0.715132	0.107907	0.582949	0.455789	0.625059	0.820168	0.00271277		0.12131	0.462417	0.0349721	0.101352	0.677784	0.275561	0.00271277
KPNA2	0.0197201	0.00275621	0.236322	0.00472515	0.00957768	0.570294	3.25306e-05	0.0609324	0.830358	0.400807		0.0681449	0.16761	0.0296062	0.324928	0.176854	0.860492	0.400807
KPNB1	0.375403	0.270688	0.649741	0.560781	0.544652	0.00601705	0.511739	0.0305905	0.275148	0.367742		0.393585	0.815474	0.378267	0.0215608	0.499183	0.0481005	0.367742
KPNA1	0.00836931	0.58577	0.335444	0.567902	0.0137984	0.124185	0.731305	0.0523175	0.362292	0.00887607		0.374419	0.278911	0.0337737	0.898073	0.521932	0.924097	0.00887607
KPNA3	0.884452	0.0880627	0.568842	0.0639386	0.212719	0.172311	0.726095	0.408141	0.163294	0.0851047		0.30317	0.42667	0.0757795	0.678164	0.880841	0.558479	0.0851047
KPNA4	0.179463	0.0530249	0.378024	0.0513349	0.917229	0.0869869	0.982474	0.519711	0.666723	0.0723459		0.119994	0.0583617	0.213429	0.969596	0.156713	0.543729	0.0723459
KPNA5	0.0169627	0.0151369	0.0644912	0.413721	0.0921815	0.082634	0.182508	0.00761275	0.422338	0.639826		0.00986941	0.0288006	0.0820108	0.494121	0.785411	0.598249	0.639826
KPNA6	0.0395756	0.0606295	0.0435129	0.823616	0.507167	0.514769	0.0770906	0.128992	0.522842	0.165339		0.791201	0.479839	0.506846	0.0966757	0.716858	0.6994	0.165339
IPO4	0.31112	0.200676	0.931365	0.793239	0.0452076	0.0602795	0.883536	0.0119338	0.415182	0.478283		0.523945	0.952555	0.0254117	0.450129	0.912905	0.947106	0.478283
IPO5	0.430156	0.151269	0.893862	0.599263	0.00972356	0.00645572	0.497145	0.234833	0.230514	0.0257461		0.0818662	0.524743	0.0697155	0.184735	0.69681	0.370078	0.0257461
IPO7	0.0879377	0.0282361	0.152253	0.481243	0.187266	0.704058	0.99769	0.380964	0.668326	0.00150799		0.0383018	0.155002	0.0343322	0.593992	0.0604269	0.539001	0.00150799
IPO8	0.139391	0.218308	0.832686	0.322174	0.532147	0.700313	0.0573689	0.00202521	0.508081	0.119732		0.576492	0.639661	0.109234	0.0127512	0.622092	0.702138	0.119732
IPO9	0.0195912	0.0510421	0.0672457	0.849305	0.0103483	0.0258784	0.530095	0.0133329	0.300969	0.0416998		0.505297	0.362319	0.0881326	0.184811	0.643819	0.600924	0.0416998
IPO11	1.08868e-05	0.0845905	0.0105395	0.209053	0.00684551	0.257389	5.25351e-05	0.0555111	0.577034	0.149027		0.236559	0.585859	0.111398	0.679769	0.0498442	0.824062	0.149027
IPO13	0.144976	0.823929	0.06369	0.00519686	0.330895	0.13537	0.000712621	0.00188622	0.204899	0.0401445		0.00119748	0.263353	0.108333	0.577612	0.00370456	0.429637	0.0401445
CPSF6	0.000372059	0.0325392	0.0187873	0.126479	0.0657587	0.0447753	0.0421821	0.0871905	0.761893	0.239425		0.0175419	0.124745	0.16301	0.84356	0.134115	0.195696	0.239425
MX2	1.37215e-05	0.0125379	0.00544708	0.112851	0.000598204	0.000661139	0.667142	0.00443061	0.183967	7.53995e-08		0.000250342	0.102132	0.206383	0.190403	6.19875e-06	0.0337601	7.53995e-08
# of Experiments	5	4	3	3	3	3	3	4	3	4		5	3	3	5	3	3	3
	Effect of siRNA knockdown on CsA (-CsA compared to +CsA)		Effect of siRNA knockdown on Mx2 activity in the presence of CsA				Effect of siRNA knockdown on Mx2(N91)-Arfaptin activity					Effect of siRNA knockdown on CsA (-CsA compared to +CsA)				Effect of siRNA knockdown on Mx2 activity in the presence of CsA
siRNA	WT	A92E		WT				WT				WT	A92E	N57S		WT	N57S
SEH1L	0.0541316	0.33898		0.139285				0.973217				0.306115	0.779683	0.129965		0.000145288	0.112767
NUP85	0.479668	0.00887514		0.0651607				0.0961065				0.0933094	0.0442453	0.0027729		0.000174238	3.36378e-07
NUP160	0.194372	0.129581		0.00729953				0.109758				0.109945	0.0578501	0.0412027		0.766401	6.78922e-09
SEC13	0.307968	0.00735487		0.614881				0.0963994				0.151443	0.0572856	0.0125507		0.0590459	0.000258372
NUP98	0.515038	4.92148e-05		0.444345				0.000451858				0.555693	0.723323	0.0392854		3.30999e-06	1.92066e-05
NUP107	0.112763	0.000174121		0.548729				0.234066				0.0891703	0.316819	0.000643627		0.646515	4.21955e-06
NUP133	0.702619	0.362968		0.764355				0.259653				0.298806	0.185833	0.00470905		0.512549	2.71947e-05
NUP37	0.521254	0.718115		0.000242515				0.337682
NUP43	0.0124998	0.00103497		5.77754e-06				0.277087				0.204145	0.197328	0.000379664		0.00622654	0.00156418
AHCTF1	0.102297	0.684594		0.563735				0.0121027				0.373473	0.171792	0.0193842		0.0149119	0.260139
NUP93	0.933067	0.362553		0.307305				0.0445771				0.200233	0.0547296	0.0246582		0.710805	6.09797e-05
NUP205	0.442205	0.26085		0.119928				0.00430752				0.102072	0.0367365	0.155429		0.28656	8.25357e-07
NUP188	0.000940981	0.557996		0.00529675				0.0874549				0.0813424	0.256381	0.000801589		0.210997	2.31653e-06
NUP155	0.00464528	0.00269019		0.255127				0.174435				0.0885829	0.0212938	0.014897		0.0645393	8.09152e-07
NUP35	0.0698194	0.480948		0.0132252				0.116357				0.0816946	0.556266	0.123932		0.00321727	0.000906475
NUP62	0.407357	0.154683		0.776503				0.0253246				0.318038	0.0244858	0.0510432		0.0663531	0.00500777
NUP54	0.0714086	0.0329442		0.00123907				0.0558291				0.0456715	0.0204879	0.00295082		0.00778695	1.93479e-07
NUPL1	0.170894	0.0369784		0.00279125				0.0646055				0.000188595	0.0270061	0.0211106		3.9042e-05	2.91541e-05
NUP210	0.0073928	0.269527		0.64023				0.0936459
GLE1	0.27603	0.734102		0.442832				0.00510433				0.628818	0.0682502	0.18398		0.0297959	0.0133849
RANBP2	0.166213	0.137814		0.759277				0.0593339				0.000330128	0.00409359	0.168263		0.137197	0.000341048
NUP88	0.241105	0.418962		0.177181				0.0182797				0.0833655	0.849667	0.631426		0.525434	0.654398
NUP214	0.25351	0.165549		0.351025				0.00106947				0.0903059	0.0841243	0.0247107		0.129428	0.766698
RAE1	0.00101905	0.835575		0.00816905				0.000250963
AAAS	0.917458	0.840931		0.745034				0.189504				0.00283084	0.153215	0.0211448		0.00440487	0.000395485
NUP153	0.0319352	0.174227		0.178481				0.16646				0.00652824	0.00573456	0.143934		0.0518086	6.02827e-05
NUP50	0.0793894	0.101483		0.618956				0.464142				0.956212	0.0688517	0.220864		0.000319064	0.404266
TPR	0.709546	0.373808		0.140713				0.000981004				0.155912	0.0465248	0.0257198		0.000396723	0.0291929
TNPO3	0.246743	0.0151795		0.00715488				0.0602788				0.0695338	0.0181416	0.00915805		0.776692	0.00164251
TNPO1	0.80356	0.044865		0.0265623				0.272734				0.343002	0.0880226	0.0280087		0.0310446	0.0347062
TNPO2	0.953672	0.18826		0.555275				0.384021				0.579649	0.176294	0.0462858		0.889255	0.23541
KPNA2	0.903312	0.00852205		0.945547				0.0214378				0.530011	0.173725	0.0297416		0.0168299	0.0509719
KPNB1	0.183945	0.453221		0.000504719				0.0585885				0.154953	0.162368	0.0141168		0.0703352	0.484458
KPNA1	0.783356	0.779955		0.307498				0.777612				0.665487	0.679612	0.144658		0.0979835	0.604132
KPNA3	0.112092	0.115395		0.300279				0.267361				0.295024	0.44751	0.901189		0.0455561	0.135543
KPNA4	0.589672	0.430099		0.0708166				0.615032				0.899237	0.0759609	0.103238		0.451273	0.0595578
KPNA5	0.164515	0.683069		0.169258				0.0316486				0.769927	0.167487	0.191766		0.0464017	0.136473
KPNA6	0.152969	0.702909		0.878198				0.274125				0.965715	0.0936819	0.113346		0.096227	0.00357335
IPO4	0.0976758	0.00999789		0.481457				0.0243578				0.345729	0.674726	0.00910894		0.0803078	0.153213
IPO5	0.686059	0.0369242		0.239804				0.0261105				0.502646	0.0188732	0.00647657		0.886975	0.0253981
IPO7	0.271972	0.210474		0.747794				0.030334				0.824913	0.330677	0.00714172		0.355814	0.0271879
IPO8	0.869996	0.728208		0.765972				0.126638				0.456384	0.177314	0.0106638		0.481245	0.049096
IPO9	0.279275	0.637993		0.579897				0.123878				0.659116	0.371328	0.445398		0.360006	0.281987
IPO11	0.00210563	0.888186		0.197438				0.0175119				0.800195	0.328722	0.00213734		0.00650758	0.00859421
IPO13	0.0763958	0.00251575		0.159059				0.972011				0.797933	0.00565153	0.246398		0.297148	0.0111446
CPSF6	0.44743	0.000528506		0.768235				0.0191259				0.0493875	0.780965	0.000695573		0.210423	8.82973e-07
MX2	0.079542	0.00363852		0.00210449				0.167735				2.14079e-06	0.000135901	0.354928		0.244332	0.000149983
# of Experiments	3	3		3				3				3	3	3		3	3

## Sheet: Nup NTR Knockdown Statistics 2
P values generated from two-tailed unpaired t tests for data represented in Figures 8-11.
Not including Figure 8-figure supplements 2D, 3A-C (shown in separate tab)
Statistical analysis includes biological replicates not shown in figures.
Blank wells represent samples that were not included in analysis due to insufficient knockdown or lack of expression as noted in the figures
Color code:	p > 0.05; 0.05 ≥ p ≥ 0.01; 0.01 > p ≥ 0.001; p < 0.001
Effect of siRNA knockdown on infectivity
		WT HIV-1 dividing cells			WT HIV-1 Non-dividing cells			FIV			N57S			A92E			T210K			G89V
	Cell Line 1:	HeLa	HeLa	HT1080	HeLa	HeLa	HT1080	HeLa	HeLa	HT1080	HeLa	HeLa	HT1080	HeLa	HeLa	HT1080	HeLa	HeLa	HT1080	HeLa	HeLa	HT1080
siRNA	vs. Cell Line 2:	HT1080	HOS	HOS	HT1080	HOS	HOS	HT1080	HOS	HOS	HT1080	HOS	HOS	HT1080	HOS	HOS	HT1080	HOS	HOS	HT1080	HOS	HOS
SEH1L		0.0363709	0.849286	0.0567579	0.145333	0.10806	0.903574	0.743754	0.254625	0.226252	0.336995	0.441833	0.958881	0.552291	0.260681	0.402774	0.0367421	0.0216849	0.754123	0.414631	0.0817059	0.208585
NUP85		0.38738	0.275438	0.870658	0.043078	0.649365	0.0916038	0.0272094	0.143057	0.795779	0.469179	0.102495	0.062487	0.0140632	0.710278	0.6921	0.0229535	1.89047e-05	0.0554277	0.366475	0.0143191	0.0263063
NUP160		0.000978909	0.185157	1.98008e-07	0.520958	0.256116	0.110847	0.043929	0.300565	0.0439247	0.000905383	0.00322376	0.637891	0.649148	0.670779	0.417985	0.00265666	0.677862	0.0136575	2.35495e-06	3.29296e-05	0.245204
SEC13		0.000267066	0.0307442	0.000484316	0.0056552	0.51633	0.00700888	0.106914	0.627857	0.270064	0.000151438	0.000370736	0.702899	0.348356	0.318105	0.129054	0.00946111	0.338808	0.139056	2.38082e-05	0.000212625	0.33734
NUP98		1.84239e-09	0.000457868	0.000902026	0.00467304	0.123888	0.0787763	0.0729482	0.0298691	0.494241	6.13187e-06	2.58587e-06	0.0899858	0.168569	0.0423025	0.176767	0.0440129	0.00039743	0.287984	0.0789423	1.42429e-06	0.437122
NUP107		0.000802509	0.526501	0.00278325	0.00339536	0.620542	0.0179526	0.00199917	0.823915	0.0324156	1.48538e-05	0.000102154	0.271951	0.00142618	0.262513	0.0894782	0.0159844	0.150324	0.164343	0.0862	0.000666062	0.377272
NUP133		0.0110206	1.14468e-08	0.00155299	0.505567	0.20866	0.247518	0.386111	0.129851	0.273229	1.49395e-06	0.000498235	0.0281219	0.091721	0.00287145	0.000592297	0.00837884	0.75589	0.00407945	0.148072	0.0581131	0.395362
NUP37
NUP43		0.016956	0.769507	0.0487219	0.541473	0.235461	0.662284	0.278744	0.000973666	0.00854404	0.149456	0.0586601	0.765725	0.34383	0.509941	0.786098	0.00068274	0.040223	0.0828748	0.00944913	0.00752689	0.293088
AHCTF1		0.000686466	0.0300411	0.318912	0.0310836	0.963542	0.234699	0.982461	0.7568	0.778696	3.95482e-06	0.00182343	0.323705	0.0298806	0.633708	0.508457	0.00162983	0.00826027	0.189871	0.0413718	0.00334301	0.0352053
NUP93		0.00113932	0.389453	0.000146357	0.918297	0.00840119	0.0426496	0.136401	0.0048107	0.00865591	0.0595586	0.7456	0.186636	0.116083	0.168681	0.231219	0.520316	0.100621	0.0844228	0.000942651	0.019256	0.568634
NUP205		0.482868	0.0353794	0.00294509	0.639204	0.000177109	0.034211	0.645411	0.000884667	0.00411329	0.256886	0.945552	0.373045	0.717035	0.101157	0.133387	0.952964	0.0403677	0.00679621	0.873917	0.862892	0.617458
NUP188		0.405831	0.837023	0.621475	0.650672	0.737545	0.999111	0.172729	0.0692344	0.0109456	0.535726	0.39213	0.15305	0.0106596	0.0231245	0.0900553	0.0538909	0.82097	0.0837973	3.30666e-07	0.000121787	0.0097364
NUP155		0.0022654	0.000174311	0.00102652	0.595692	0.000115696	0.00409643	0.694796	0.524659	0.765109	0.264536	0.773761	0.580669	0.000178029	9.39951e-05	0.274468	0.313119	0.0182179	0.013537	0.0818401	0.0402616	0.98664
NUP35		6.37597e-07	2.32047e-08	2.88814e-07	0.000173751	0.000808171	1.10618e-05	0.801687	0.728514	0.553477	0.632195	0.894093	0.579994	0.000208326	0.528495	0.0263816	0.000457096	0.551519	0.0138982	0.944156	0.0243756	0.0434522
NUP62		5.61725e-07	0.0143041	2.12033e-06	0.00812338	0.000206172	0.00570171	0.0908438	0.254321	0.400213	0.749902	0.786447	0.213264	0.0616009	0.618633	0.709102	0.00262286	0.395165	0.00243051	0.000123409	0.00106033	0.674877
NUP54		4.38705e-09	0.00158849	7.42669e-07	0.000705941	0.00287218	0.00321486	0.241217	0.0332892	0.129229	0.779941	0.0290903	0.0134934	5.22438e-05	0.983495	0.00300856	2.57002e-05	0.712174	0.000416079	4.68111e-06	0.000118195	0.102768
NUPL1		4.46711e-09	0.817102	2.97077e-06	0.00207515	0.838517	0.0160627	0.406946	0.0612269	0.0863642	0.215181	0.474244	0.075022	5.07667e-06	0.239115	0.288821	0.000365935	0.108459	0.00352677	9.46743e-07	0.00466195	0.00605335
NUP210			1.16601e-06			9.10332e-05			0.927497			0.0365519			0.0264423			0.968233			0.0130228
GLE1		0.880716	0.172894	0.431349	0.573601	0.582288	0.313338	0.0192321	0.035532	0.614574	0.219202	0.434007	0.164478	0.0014219	0.451467	0.591994	0.0993746	0.863457	0.0882491	0.137144	0.000130124	0.0365239
RANBP2		0.803883	0.00278309	0.00312928	0.00285107	0.00120032	0.771683	0.00515088	0.0378596	0.917222	0.000100249	0.0103127	0.698312	0.0404366	0.475179	0.0197942	0.0318889	0.909158	0.116078	2.28837e-07	9.89538e-05	0.622715
NUP88		1.63116e-07	1.18842e-07	0.966433	0.12247	0.0117597	0.0322848	0.0835262	0.0712024	0.367831	3.92906e-06	0.000992723	0.186628	0.000213058	0.0402086	0.700099	4.55351e-07	0.0011728	0.00502507	0.00596119	2.36173e-05	0.00032931
NUP214		8.87453e-11	6.50815e-12	0.157399	0.000537249	0.00128533	0.0726384	0.47491	0.76	0.713316	6.57202e-05	0.0019169	0.34628	0.379757	0.0635325	0.118415	0.724461	0.714457	0.14768	0.0608156	1.21238e-06	3.63499e-05
RAE1		0.0567763			0.0637635			0.00967134			0.0887315			0.638501			0.106431			0.219316
AAAS		0.0299567	3.17401e-07	0.000588324	0.622227	0.00379384	0.000144293	0.834869	0.00478078	0.269516	0.37085	0.18653	0.360038	0.812183	0.0290673	0.0180621	0.29576	0.0101559	0.0347667	0.001612	0.336825	0.268677
NUP153		5.11871e-05	0.873898	0.0005746	4.70581e-05	0.019206	0.0114665	0.0275746	0.138255	0.674764	6.37811e-07	0.000134995	0.45158	0.849968	0.205363	0.107538	0.962994	0.939262	0.771513	0.0485632	0.011128	0.107131
NUP50		0.0204989	0.0020206	0.81759	0.433995	0.795453	0.392273	0.606108	0.55067	0.785493	0.000393372	0.266159	0.01758	9.41464e-05	0.042006	0.46252	0.357394	0.349568	0.927398	0.848595	0.000463744	0.00750869
TPR		0.015453	0.00756555	0.01593	0.27465	0.00560504	0.0942022	0.143873	0.204522	0.523267	0.962063	0.0171966	0.0378758	0.81781	0.321925	0.436085	0.224454	0.0478455	0.00764617	0.000851865	0.0506331	0.924306
TNPO3		0.689761	0.114455	0.180013	0.000148281	0.000141605	0.514179	0.155428	0.819722	0.254152	0.0325229	0.116107	0.919982	0.0967878	0.167666	0.674757	0.000312518	0.761683	0.00308999	0.000143786	2.52886e-07	0.000625515
TNPO1		0.00296399	0.0122078	0.470297	0.547105	0.0579984	0.145305	0.193736	0.856172	0.16409	0.716952	0.0478586	0.0536737	0.000886289	0.00374653	0.886525	0.00691978	0.000979836	0.0336656	0.973473	0.67923	0.786815
TNPO2		0.143565	0.187659	0.119403	0.0151899	0.633176	0.0630314	0.00773157	0.0205917	0.102307	0.0325594	0.0146776	0.101947	0.0737234	0.952527	0.590289	0.392633	0.433244	0.774261	0.16462	0.000518057	0.0121517
KPNA2		5.68779e-06	0.466811	0.175279	0.0821985	0.0843071	0.371807	0.000474637	0.115783	0.594089	0.220852	0.0412907	0.229361	2.15517e-06	0.000461916	0.850098	0.106103	0.874891	0.18526	0.479519	0.000600786	0.0113834
KPNB1		0.00439397	0.142577	0.00585769	0.0645975	0.167305	0.0151264	0.208072	0.000574401	0.000534659	0.72762	0.35569	0.928918	0.0298023	0.19133	0.777951	0.0372974	0.00302698	0.000105769	0.297961	0.045495	0.000925174
KPNA1		0.378069	0.250576	0.409877	0.253366	0.642772	0.796765	0.4339	0.754941	0.918675	0.924281	0.0586477	0.0197273	0.75749	0.613543	0.615546	0.0231717	0.34067	0.170769	0.00795853	0.00106058	0.328933
KPNA3		0.0996701	0.07706	0.646661	0.495001	0.332161	0.693932	0.141529	0.151855	0.0544801	0.948228	0.0482601	0.0467407	0.112782	0.630204	0.336416	0.0418255	0.121011	0.065969	0.138345	0.138297	0.547743
KPNA4		0.999884	0.951078	0.960069	0.942095	0.00993946	0.233676	0.00706599	0.0468121	0.454622	0.121731	0.0118808	0.535336	0.0341459	0.379656	0.336591	0.131753	0.0606139	0.221005	0.424718	0.000961014	0.0123137
KPNA5		0.00188961	0.35532	0.0413672	0.00519865	0.308116	0.102234	0.296102	0.625653	0.905483	0.189935	0.0876411	0.338721	2.22516e-05	0.353282	0.198209	0.0454566	0.0363746	0.744411	0.156945	0.00502463	9.21341e-05
KPNA6		0.274616	0.189482	0.113764	0.205981	0.00576634	0.134065	0.715368	0.946417	0.85978	0.00235921	0.647973	0.114625	0.590499	0.862344	0.700282	0.215444	0.12911	0.644243	0.143319	0.00182541	0.257505
IPO4		0.0253921	0.0122327	0.579891	0.0939048	0.100155	0.596013	0.00253663	0.0221822	0.489091	0.880895	0.0227636	0.00938797	0.471119	0.599567	0.53686	0.158111	0.0601238	0.00197496	0.11992	0.0591405	0.864873
IPO5		0.01129	0.777508	0.16918	0.33402	0.00199695	0.0930619	0.719235	0.037941	0.0284573	0.83034	0.898815	0.327568	5.17271e-06	0.445279	0.0651925	0.793776	0.116661	0.0227647	0.537513	0.0221838	0.0175286
IPO7		0.0137798	0.00921803	0.633335	0.569802	0.387879	0.805674	0.217831	0.0129148	0.00425644	0.000948413	0.0799719	0.00745053	0.0835005	0.635945	0.268941	0.529429	0.261918	0.201944	0.00818739	5.20782e-06	0.00657953
IPO8		0.0305197	0.8592	0.171918	0.0325049	0.000379222	0.000321581	0.400021	0.0822108	0.00823698	0.000129931	0.0457799	0.017701	0.415614	0.610427	0.530218	0.627515	0.239523	0.0283403	0.431078	0.303106	0.97371
IPO9		0.718252	0.837406	0.976359	0.64608	0.182986	0.420767	0.00324829	0.0208304	0.513991	0.794003	0.868824	0.383292	0.876402	0.995759	0.911136	0.267796	0.439297	0.518448	0.00281364	0.00330179	0.921752
IPO11		0.000817261	0.0251972	0.000291484	9.67105e-05	0.00025023	0.957593	0.415247	0.0588392	0.370316	0.116498	0.437191	0.65895	0.000202974	0.67885	0.0468049	0.0115431	0.444932	0.028693	0.0264358	0.000295404	0.000540603
IPO13		0.00529395	0.0401094	0.00108737	0.291512	0.00414451	0.0808923	0.253373	0.0111004	0.0911948	0.291486	0.300929	0.141914	0.343401	0.872312	0.851274	0.714474	0.552054	0.00440927	0.00438012	0.952014	0.0457717
CPSF6		0.00168054	0.259812	0.315541	0.006331	0.00562242	0.142248	0.000852465	0.468231	0.000784173	0.989275	0.139546	0.0265369	0.0259347	0.908238	0.198794	0.248022	0.000890541	0.0197286	9.99946e-09	0.00123969	0.00343224
MX2		0.000678197	0.00303856	0.588632	0.0897016	0.232733	0.966681	0.136022	0.920446	0.100427	0.801039	0.952735	0.581817	0.0370732	0.0108836	0.218894	0.525966	0.158408	0.0346268	0.00597598	0.38397	0.0182868
Effect of siRNA knockdown on infectivity
		HeLa										HT1080							HOS
	Virus 1:	WT HIV-1										WT HIV-1							WT HIV-1
siRNA	vs. Virus 2:	WT Non-dividing cells	HIV-2	SIVmac	FIV	EIAV	N57S	A92E	T210K	G89V		WT Non-dividing cells	FIV	N57S	A92E	T210K	G89V		WT Non-dividing cells	FIV	N57S	A92E	T210K	G89V
SEH1L		0.0363709	0.192581	0.0286478	0.631468	0.271643	0.506046	0.0179006	0.811167	0.0561163		0.47025	0.109644	0.115946	0.779126	0.569277	0.795102		0.25117	0.183443	0.116904	0.141565	0.00473127	0.011523
NUP85		0.38738	8.9475e-05	1.09668e-09	0.00252755	0.786125	0.642465	7.62344e-05	0.286784	6.30406e-05		0.376782	0.00215183	0.00203326	0.893297	0.269942	0.205147		0.0579201	0.0793613	0.0977249	0.797866	0.00636202	0.00362722
NUP160		0.000978909	0.868309	0.167735	0.00290535	0.00964222	0.0109525	0.341859	0.522049	0.766183		0.417358	0.0112595	0.0117993	0.00981266	0.00876177	0.000443099		0.00166193	0.0794758	0.0748579	0.148102	0.0323827	7.51493e-05
SEC13		0.000267066	0.342386	0.130607	7.66805e-07	0.0028742	0.00132875	0.00839913	0.0449776	0.742808		0.460451	0.103562	0.106863	0.242626	0.848664	0.00329165		0.00784053	0.000415201	0.000593445	0.252564	0.00279566	0.000858687
NUP98		1.84239e-09	0.0996144	0.00330748	0.023072	0.859286	3.53339e-05	0.00162001	0.794353	8.62897e-05		0.104454	0.00103349	0.00206986	0.000150191	0.230572	0.302208		0.0975198	0.451032	0.80491	0.230081	0.586827	0.194078
NUP107		0.000802509	0.104515	0.00461911	0.00091191	0.0102827	0.00326026	0.252158	0.152884	0.500373		0.938976	0.0860859	0.0826048	0.330423	0.264024	0.136877		0.416108	0.0120179	0.0255883	0.0101768	0.00412132	0.000118025
NUP133		0.0110206	0.00600337	0.0334965	0.00117547	0.0550034	5.99151e-13	0.00448313	0.495365	0.307153		0.990073	0.733499	0.808241	0.0961889	0.147183	0.181207		0.0158288	9.68031e-05	0.000241826	0.00386804	0.00604025	0.000356791
NUP37		9.54276e-07	0.418689	0.138332	0.330584	0.000536181	0.00884155	0.984845	0.0127775	0.00986369
NUP43		0.016956	0.546158	1.90115e-05	0.71486	0.00985172	0.0783174	0.637408	0.372523	0.0386485		0.805969	0.342224	0.260259	0.127087	0.0327655	0.0525857		0.291326	0.000914964	0.0028574	0.605454	0.0775782	0.00143361
AHCTF1		0.000686466	0.558644	0.295519	6.97978e-05	0.0178457	0.000311877	0.194012	0.975079	0.741452		0.536007	0.0429255	0.0743196	0.648599	0.215404	0.0248534		0.782671	0.883911	0.668117	0.343783	0.390999	0.476947
NUP93		0.00113932	0.217288	0.089181	0.0235092	0.0275283	0.0244933	0.813431	0.0745165	0.786094		0.422516	0.174876	0.10301	0.0650668	0.872831	0.256665		0.13957	0.966224	0.782956	0.218339	0.177541	0.0234851
NUP205		0.482868	0.194051	0.0732845	0.04143	0.147136	0.0039506	0.821504	0.58444	0.24265		0.343074	0.0650041	0.0329329	0.162182	0.894188	0.0303628		0.524281	0.71213	0.872089	0.11577	0.979914	0.0463155
NUP188		0.405831	0.170305	1.8742e-05	0.955838	0.00503301	0.000265034	9.48634e-07	0.610921	1.61935e-07		0.343811	0.607737	0.592214	0.0611492	0.00353397	0.718184		0.262225	0.062697	0.153299	0.268149	0.381637	0.0211783
NUP155		0.0022654	0.00142496	1.3151e-07	0.0479625	0.931091	0.861484	2.13157e-06	0.000380405	0.00288256		0.742097	0.213348	0.244904	0.0151049	0.28482	0.193742		0.72717	0.00196226	0.0057862	0.870121	0.0106618	0.0378158
NUP35		6.37597e-07	0.00570886	0.802729	4.40784e-05	0.16634	0.00892443	0.462642	0.703627	0.0639159		0.878386	0.602642	0.570954	0.250831	0.0336559	0.000587315		0.579062	2.26533e-06	8.55409e-06	0.268585	0.0354789	0.000585494
NUP62		5.61725e-07	0.0143843	0.000967246	0.01554	0.2324	0.00133207	0.000828351	0.869654	5.54055e-07		0.111967	0.000190015	0.000427002	1.97401e-06	0.727821	2.13655e-06		0.00634852	0.00653105	0.0146952	0.841505	0.385373	0.638849
NUP54		4.38705e-09	0.000642173	4.27771e-07	1.00536e-05	0.000118694	0.691063	0.00342043	0.105074	2.1155e-07		0.109649	0.0167543	0.032936	2.31502e-05	0.534212	0.000122384		0.000185613	0.116425	0.0788532	0.760782	0.957064	0.0146364
NUPL1		4.46711e-09	0.0060305	1.08897e-05	1.74309e-05	2.48418e-05	0.255808	0.00855177	0.0034607	0.0023372		0.0837548	0.0920267	0.164648	5.06161e-05	0.375434	0.000517582		0.00361706	0.0583842	0.110739	0.599546	0.940945	0.190972
NUP210		0.884154	0.00435867	0.00168746	0.576992	0.000638876	5.19124e-07	0.0963525	3.85338e-05	9.63923e-07									0.131108	0.0107983	0.0162466	0.412896	0.480834	0.0127719
GLE1		0.880716	0.0145133	4.29035e-06	2.20354e-05	0.0168246	5.67095e-06	0.0268894	0.00380513	1.97262e-06		0.8026	0.407192	0.424117	0.068283	0.882954	0.250073		0.45304	0.656893	0.981896	0.657728	0.167086	0.192766
RANBP2		0.803883	0.0754509	0.0209767	6.1747e-07	2.0236e-05	0.00248331	0.901941	0.871096	0.309743		0.402272	1.95901e-07	3.0789e-07	0.0487726	0.00494311	1.99355e-07		0.015719	0.000174639	0.000345863	0.096088	0.0952352	0.000121355
NUP88		1.63116e-07	0.797604	0.0301418	0.002389	0.154434	0.0117954	0.981749	0.120055	0.000739057		0.0882443	0.28135	0.322827	0.123903	0.912681	1.43915e-05		0.2153	0.75726	0.847212	0.79206	0.00582847	0.0151866
NUP214		8.87453e-11	0.692444	0.895447	1.9081e-05	2.66473e-05	0.1029	0.16983	0.147431	0.032312		0.705057	0.804932	0.724636	0.000778321	0.62263	3.63703e-08		0.315373	0.244448	0.21986	0.675354	0.000189597	0.241524
RAE1		0.0567763	0.0148899	0.00643268	0.994268	0.00477843	0.0343676	0.526279	0.22758	0.0013105									0.648782	0.274439	0.810985	0.259312	0.0812381	0.659348
AAAS		0.0299567	0.00488307	0.000596328	0.0967066	0.161639	0.000532491	0.371875	0.000189012	1.90251e-05		0.67678	0.853771	0.845494	0.644779	0.963189	0.179832		0.0699506	0.249769	0.117394	0.908593	0.128055	0.0149051
NUP153		5.11871e-05	0.0136734	0.00883919	1.71244e-10	1.24529e-10	0.956687	0.014514	0.113688	0.000736375		0.644864	6.8489e-09	1.51133e-08	0.205666	0.00741493	0.0182818		0.469267	3.86801e-06	1.43246e-05	0.539842	0.00769916	0.00690388
NUP50		0.0204989	0.00314544	0.0169242	7.41981e-08	7.17525e-07	3.2318e-06	0.00120295	0.358091	0.0075545		0.951658	0.333762	0.420715	0.186983	0.865713	0.389547		0.30831	0.476359	0.466905	0.904542	0.912851	0.0135965
TPR		0.015453	8.53056e-07	0.101892	0.00405221	0.00174483	0.00069507	0.472372	0.962434	0.00243975		0.568846	0.106747	0.131646	0.04733	0.281895	0.1281		0.552564	0.24268	0.14714	0.14197	0.574911	0.0769019
TNPO3		0.689761	0.00247414	0.00322251	5.39364e-07	0.00189807	8.71372e-12	0.885993	4.1148e-06	1.42105e-05		0.78218	1.31465e-13	8.21888e-13	0.119462	0.89765	5.39067e-08		0.233831	0.00184922	0.00492391	0.878012	0.354063	0.000662469
TNPO1		0.00296399	0.000360796	2.3567e-05	0.246018	0.000468106	0.0186572	0.247215	0.0725576	0.000106554		0.136757	0.597228	0.685094	0.00614486	0.669379	0.186508		0.328595	0.231202	0.256574	0.462684	0.41914	0.945402
TNPO2		0.143565	0.868703	0.285186	0.0218496	0.207572	0.422109	0.395007	0.0927547	0.00795339		0.650296	0.202728	0.308468	0.851408	0.551054	0.858925		0.42885	0.76318	0.755283	0.261164	0.260288	0.783564
KPNA2		5.68779e-06	0.00243892	2.22739e-05	5.18328e-07	1.57489e-08	0.0005825	0.0496181	6.93955e-05	9.24305e-06		0.0313305	0.0106787	0.0204116	0.723442	0.0948561	0.560002		0.323466	0.438111	0.486652	0.279167	0.287524	0.843069
KPNB1		0.00439397	0.6824	0.133674	5.46232e-05	2.85783e-05	5.39699e-05	0.00990489	0.0801298	0.276539		0.0252089	0.358684	0.311267	0.0129161	0.0179423	0.893573		0.481797	0.923917	0.700525	0.358315	0.30191	0.649706
KPNA1		0.378069	0.61022	0.157658	0.712393	0.0308036	0.00169047	0.166809	0.00144823	3.43722e-05		0.54388	0.770825	0.716551	0.0820173	0.928153	0.237683		0.400611	0.597883	0.614058	0.466158	0.255063	0.584325
KPNA3		0.0996701	0.803203	0.0877821	0.0861345	0.0223331	0.346578	0.933496	0.0125373	0.718106		0.346822	0.155081	0.14636	0.620585	0.0869574	0.991035		0.607729	0.356915	0.339838	0.24468	0.345714	0.952206
KPNA4		0.999884	0.203987	0.0664068	0.0705987	0.0236603	0.535321	0.593782	0.037044	0.0139413		0.362871	0.682725	0.728525	0.290311	0.991282	0.22968		0.0268435	0.388984	0.693476	0.445222	0.363007	0.34517
KPNA5		0.00188961	0.316504	0.184982	0.00252559	0.00178735	0.0185503	0.950525	0.0502099	0.0141345		0.32307	0.240052	0.336007	0.332592	0.674965	0.454404		0.183875	0.731174	0.84084	0.409177	0.0732265	0.0233892
KPNA6		0.274616	0.0598033	0.655719	0.361207	0.0324231	0.154871	0.988886	0.0658309	0.663793		0.0489199	0.521948	0.44478	0.199371	0.412399	0.547428		0.0711916	0.320828	0.180999	0.584322	0.744535	0.00236494
IPO4		0.0253921	0.00183848	0.00432533	2.03851e-05	2.72192e-05	0.00922271	0.283482	0.229205	0.000546819		0.276397	0.981113	0.962179	0.990325	0.940992	0.37803		0.498683	0.325289	0.28535	0.500105	0.182889	0.197845
IPO5		0.01129	0.573285	0.724632	0.253282	0.16436	0.0321259	0.0682757	0.135171	0.0375092		0.695092	0.529888	0.68674	0.0770558	0.00157618	0.537924		0.0223792	0.061553	0.084617	0.333494	0.429405	0.173832
IPO7		0.0137798	0.634847	0.398373	0.0450537	0.000894773	0.785624	0.0189446	0.0572762	0.000645256		0.0772961	0.0782993	0.0577307	0.0629788	0.751895	0.0660316		0.0450629	0.0832367	0.0879016	0.870553	0.167348	0.490314
IPO8		0.0305197	0.127621	0.885802	0.0132629	0.207189	9.34055e-05	0.0924496	0.167577	0.320385		0.0710545	0.647757	0.578646	0.17433	0.292037	0.674451		0.00259821	0.00529701	0.0129289	0.50367	0.534741	0.41267
IPO9		0.718252	0.161808	0.000138229	8.70209e-05	6.38363e-06	0.00264794	0.263924	0.00836471	0.000238136		0.900004	0.817107	0.800929	0.366398	0.883157	0.543447		0.590701	0.837355	0.911369	0.617907	0.562868	0.712992
IPO11		0.000817261	0.0712533	0.030864	0.21404	0.0689137	0.665254	0.000102849	0.00398816	0.468224		0.899925	0.0234143	0.0274189	0.0399358	0.13137	0.547611		0.00134794	0.87631	0.992136	0.290915	0.884905	0.0297116
IPO13		0.00529395	0.879807	0.0121935	1.6615e-05	0.922257	0.119264	0.00124079	0.250551	8.52536e-06		0.0709906	0.0457876	0.0383587	0.953179	0.00045197	0.00026509		0.150926	0.00614828	0.00733042	0.19746	0.0413663	0.000869248
CPSF6		0.00168054	5.87683e-06	1.42048e-06	2.4158e-05	0.000310715	0.134694	0.118637	8.87968e-06	0.000820005		0.459059	0.0284264	0.0422619	0.00300206	0.409595	0.0108149		0.302756	0.101851	0.130774	0.611912	0.327578	0.880552
MX2		0.000678197	0.135596	0.639001	0.000702878	0.00123571	0.000156019	0.509794	0.59376	0.216762		0.0836177	0.0473636	0.0546501	0.403656	0.724442	0.0196326		0.576865	0.787342	0.680723	0.807933	0.437488	0.878293
Effect of siRNA knockdown on Mx2 Activity											Effect of siRNA knockdown on CsA Effect					Effect of siRNA knockdown on Mx2 vs Mx2(N91)-Arfaptin 2 in non-dividing HeLa cells
	Cell Line 1:	HeLa								Cell Line 1:	HeLa
	vs. Cell Line 2:	HT1080								vs. Cell Line 2:	HT1080
siRNA		WT	WT Non-dividing cells	FIV	N57S	A92E	T210K	G89V			WT	A92E					WT
SEH1L		0.0058478	0.14412	0.83059	0.146578	0.331403	0.619882	0.183946			0.212095	0.722012					0.00170425
NUP85		0.347879	0.0131211	0.694895	0.000235213	0.13741	0.657087	0.000322971			0.420471	0.0240205					0.000561973
NUP160		0.28526	0.122519	0.348228	0.819109	0.0730787	0.207239	0.372658			0.324335	0.670343					0.0787148
SEC13		0.597778	0.000105089	0.027591	0.0580922	0.036358	0.318059	0.0648753			0.482165	0.00350529					0.00170643
NUP98		0.253392	3.54465e-05	0.00248185	0.036971	0.000257304	0.193105	0.846875			0.947185	0.000305308					0.000494759
NUP107		0.0475588	0.00947703	0.0865757	0.979063	0.0170609	0.0888488	0.544928			0.746347	0.00404828					0.000362198
NUP133		0.0130583	0.0026231	0.0328614	0.149738	0.00297009	0.0159762	0.248339			0.272824	0.112306					0.000532042
NUP37																	0.512308
NUP43		0.710675	0.00573752	0.353784	0.183284	0.342965	0.330757	0.0556665			0.104847	3.02681e-05					0.00308329
AHCTF1		0.545738	0.0426625	0.562531	0.332131	0.73787	0.250772	0.0217235			0.210936	0.270683					0.0963077
NUP93		0.415019	0.112761	0.281091	0.851228	0.0587261	0.198967	0.154614			0.250548	0.880393					0.0300371
NUP205		0.570953	0.00118243	0.566446	0.537817	0.111779	0.115041	0.812879			0.197962	0.841518					0.0141402
NUP188		0.0893472	0.337331	0.386739	0.153405	0.951881	0.759754	0.972787			0.0504724	0.775198					0.0368781
NUP155		0.317944	9.05638e-05	0.203329	0.326987	0.0922483	0.0450485	0.285845			0.00544092	0.00095022					0.486058
NUP35		0.922776	0.0828913	0.334155	0.324985	0.450249	0.511389	0.0001241			0.0119343	0.949562					0.135619
NUP62		0.00199547	0.000327757	0.228619	0.43542	0.867118	0.030721	0.623134			0.875945	0.280946					0.00556663
NUP54		0.005695	0.108437	0.00334355	0.899825	0.370435	0.00344723	0.0179859			0.00679026	0.219586					0.498097
NUPL1		0.500149	0.0718401	0.000395868	0.390003	0.0155019	0.0668307	0.237913			0.00517082	0.588952					0.968213
NUP210																	0.0905458
GLE1		0.000889333	0.417132	0.385974	0.205285	0.00208654	0.863236	0.185871			0.223206	0.31582					0.08968
RANBP2		0.802285	0.211375	0.312829	0.191217	0.167074	0.446803	0.0972186			0.304728	0.335022					0.296748
NUP88		0.0514662	0.0270182	0.101866	0.00524428	0.0930574	0.0624402	0.279648			0.13109	0.35297					0.00524073
NUP214		0.0943528	0.0418526	0.561181	0.262681	0.252236	0.433288	0.407414			0.129704	0.371863					0.00175469
RAE1																	0.247021
AAAS		0.197396	0.378727	0.638987	0.612725	0.234028	0.60192	0.000922633			0.261072	0.839564					0.403713
NUP153		0.629858	0.0602334	0.251515	0.746121	0.185283	0.703845	0.745668			0.0482763	0.633118					0.170966
NUP50		0.194708	0.0271438	0.333484	0.181979	0.444717	0.511461	0.135579			0.087049	0.654176					0.0284362
TPR		0.214113	0.0221633	0.107284	0.1051	0.0290801	0.599559	0.0877439			0.65089	0.868612					0.454683
TNPO3		0.100518	0.22049	0.212757	5.43058e-05	0.110305	0.00544222	3.81004e-05			0.0680857	0.698572					0.924954
TNPO1		0.106444	0.015426	0.66935	0.00681827	0.119618	0.0417992	0.0591347			0.454218	0.0283655					0.00831466
TNPO2		0.977713	0.577157	0.342591	0.958835	0.700191	0.358338	0.0118704			0.578689	0.162708					0.276985
KPNA2		0.901893	0.297483	0.673165	3.81819e-06	0.731441	0.780422	0.080628			0.524316	0.00092049					0.281717
KPNB1		0.322432	0.318896	0.306736	0.0303539	0.442121	0.150408	0.0257313			0.159096	0.153331					0.291934
KPNA1		0.284246	0.54046	0.507884	0.361304	0.265975	0.548514	0.131823			0.959785	0.942424					0.941208
KPNA3		0.671696	0.481433	0.0377889	0.361165	0.22377	0.191817	0.113334			0.912431	0.121224					0.810475
KPNA4		0.173646	0.77244	0.280741	0.655233	0.14651	0.4559	0.90139			0.847934	0.0626571					0.207372
KPNA5		0.655216	0.316361	0.366116	0.0480406	0.245596	0.348109	0.892996			0.330177	0.194606					0.239393
KPNA6		0.40079	0.0703456	0.348702	0.00527306	0.282928	0.491524	0.341765			0.522714	0.40513					0.716694
IPO4		0.319521	0.377325	0.330399	0.156148	0.264054	0.58543	0.652275			0.0999689	0.00340585					0.936346
IPO5		0.0112964	0.632236	0.789508	0.307784	0.473748	0.134975	0.708562			0.681971	0.00274434					0.965312
IPO7		0.467701	0.826789	0.175296	0.768295	0.0611815	0.420078	0.0186775			0.298567	0.155272					0.29904
IPO8		0.152339	0.286798	0.087105	0.000398499	0.25233	0.480071	0.493978			0.607473	0.203762					0.731693
IPO9		0.0478076	0.881107	0.162515	0.344493	0.188139	0.275445	0.0251005			0.246581	0.70989					0.316597
IPO11		0.408098	0.134162	0.0714207	0.00546165	0.267056	0.875471	0.950055			0.00977453	0.61677					0.305491
IPO13		0.00017112	0.177346	0.24804	0.395174	0.000231264	0.839204	0.178235			0.164235	0.000363708					0.834908
CPSF6		0.413766	0.277418	0.619859	0.139781	0.25727	0.168633	0.892898			0.0818433	0.0132458					0.284683
MX2		0.991832	0.142157	0.000133782	0.312092	1.47419e-06	0.195847	0.000737179			0.0259775	0.0696382					0.0200794

## Sheet: Figure 8 Additional Statistics
P values generated from two-tailed paired ts test for data represented in Figure 8-figure supplements 2D and 3A-C .
Analysis includes three technical replicates representative three independent experiments
Color code:	p > 0.05; 0.05 ≥ p ≥ 0.01; 0.01 > p ≥ 0.001; p < 0.001
Figure 8-figure supplement 2D and 3A
	Effect of:	WT HIV-1	G89V	N57S	MLV	HIV-2	SIVmac	EIAV	FIV	N74D	A92E	G94D	G208R	T210K
	Arfaptin2	0.0817339	0.0173777	0.195111	0.0182128	0.0450903	0.0252342	0.226226	0.616259	0.0376222	0.0612115	0.127225	0.0127515	0.00758286
	CypA-Arfaptin2	0.00539993	0.0632058	0.640113	0.378448	0.069722	0.0270823	0.248606	0.0196937	0.0363957	0.0231044	0.010063	0.040956	0.0336972
	Mx1(N43)-Arfaptin2	0.0292224	0.0071177	0.265021	0.0300439	0.0809815	0.0226559	0.503069	0.0176544	0.159929	0.0216642	0.0303669	0.0428252	0.0104666
	Mx2(N91)-Arfaptin2	0.00134207	0.00175697	0.327866	0.230942	0.0371439	0.0050705	0.0806566	0.111286	0.0207535	0.00839656	0.00397672	0.0516173	0.0020155
Figure 8-figure supplement 3C					Figure 8-figure supplement 3D
		N57S			Effect of Mx2(N91)-Arfaptin2: Dividing vs Non-dividing Cells			WT HIV-1
		-CsA	+CsA					0.48585
	Arfaptin2	0.377769	0.0600982
	CypA-Arfaptin2	0.0761911	0.166525
	Mx1(N43)-Arfaptin2	0.124713	0.961281
	Mx2(N91)-Arfaptin2	0.0222596	0.0354453
